# Supplementary material for: Early detection of cryptic memory and glucose uptake deficits in pre-pathological APP mice
Source: PubMed Central journal article supplement (PMC4895343; doi:10.1038/ncomms11761), 2016-06-01
Supplement: ncomms11761-s1.pdf [file ncomms11761-s1.pdf]

**Visual Cue Task**  
*Swim speed (cm/sec)*

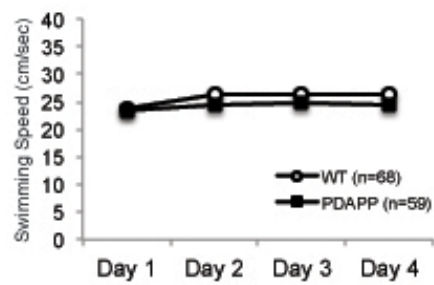

**Supplementary Figure 1:** *PDAPP mice swim in the watermaze normally.* Young WT and PDAPP mice show equivalent swim speed in the visual cue task (comparison between genotypes, ANOVA:  $F_{1,125}=3.14$ ,  $p=0.08$ ). Means  $\pm$  1 S.E.M.

**Contstruction of a “backward learning curve”**

| <i>Escape latency across sessions (sec)</i> |    |    |    |    | <i>Backward learning curve</i>                                        |    |    |    |    |    |
|---------------------------------------------|----|----|----|----|-----------------------------------------------------------------------|----|----|----|----|----|
| Mouse 1:                                    | 51 | 35 | 21 | 19 | 51                                                                    | 35 | 21 | 19 |    |    |
| Mouse 2:                                    | 63 | 25 | 17 |    | 63                                                                    | 25 | 17 |    |    |    |
| Mouse 3:                                    | 35 | 32 | 25 | 22 | 18                                                                    | 35 | 32 | 25 | 22 | 18 |
|                                             |    |    |    |    | <i>Backward learning curve (means):</i> <b>41</b> <b>23</b> <b>18</b> |    |    |    |    |    |

**Supplementary Figure 2:** *The concept of a backward learning curve.* In the spatial learning version of the task, we checked on the rate of acquisition using a variety of standard and non-standard measures one of which is a ‘backward learning curve’ (1). A backward learning curve is one that starts on the session on which criterion is actually reached by each individual animal (the criterion was a daily session of 6 trials with average escape latency <20 sec) and works back from there. Here the fictional data for escape latency of 3 individual animals is shown as normally collected across successive sessions (left), which is then averaged in alignment with the session at which criterion is reached (right). The value of a backward learning curve is that it displays the pattern at which the criterion is reached across animals.

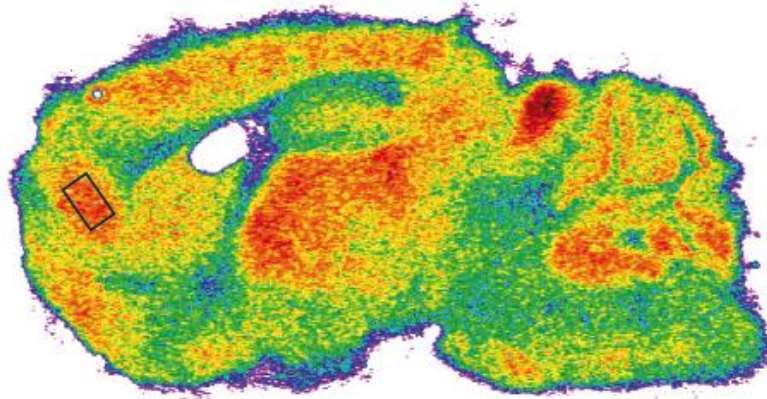

**Supplementary Figure 3:** Example of a pseudocolour [ $^{14}\text{C}$ ]-2-deoxyglucose (2-DG) image of a mouse brain sagittal section. This shows, by way of example, a 'box' placed on the region of the orbital cortex (left part of image). Densitometric measurements were made (blind) in this and a total of 32 separate brain areas across multiple sections.

PDAPP  
5 months

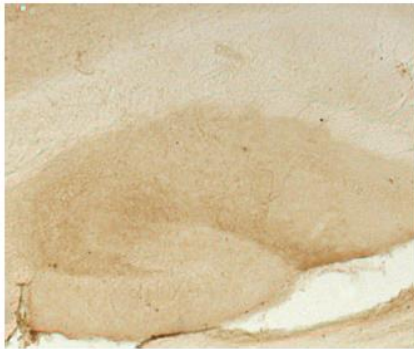

Positive Control  
(J20 APPtg - 11 months)

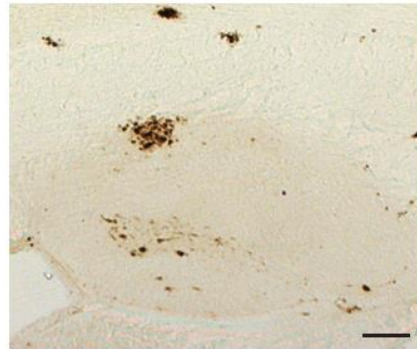

**Supplementary Figure 4:** *Absence of amyloid plaques in the brain of young PDAPP mice.* *Left:* Immunohistochemistry using the anti-A $\beta$  antibody 3D6 confirmed the absence of amyloid plaques in the brain of PDAPP mice at 5 months of age (the oldest possible age at the end of all experiments; the mice were 3-4 months-old at the outset and the experiments lasted around 1 month. Image shown here is for the hippocampus. *Right:* A brain section from an 11 month-old APP transgenic mouse (exhibiting amyloid plaques) immunostained with the same antibody and protocol serves as a positive control (right). Scale bar: 250  $\mu$ m.

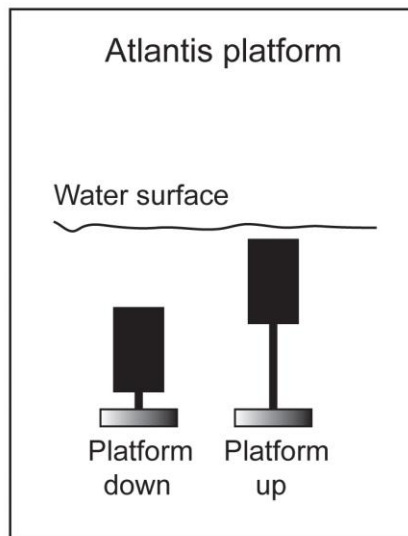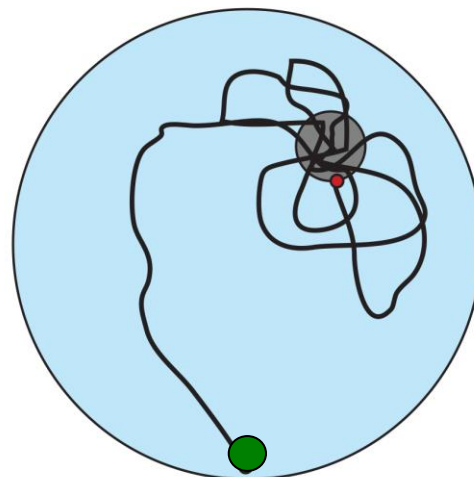

**Supplementary Figure 5:** *The Atlantis Platform in the watermaze(2)*. A cylindrical platform (made of Styrofoam) is held by electromagnets at the bottom of the pool (left). This prevents access to it and the swim paths can be across the correct location (right). When the platform is released, after 60 sec, it rises on a spindle to near the surface of the water enabling successful escape by the animals. This minimises memory extinction. The Atlantis Platform can be very useful if further within-subject probe tests are going to be performed. Green small circle – start of swim path; red small circle – end of swim path.

**7 d Probe Trial**  
*Path length (m)*

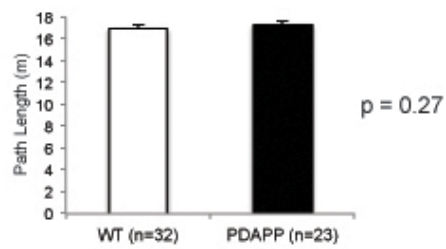

**Supplementary Figure 6:** *Normal search path-length in the watermaze by PDAPP mice.* The length of the swim path during the 7d memory retrieval probe test was equivalent between WT and PDAPP mice. The panels in the main manuscript show that the search pattern differed with respect to areas of the pool actually visited. Means +/- 1 S.E.M.

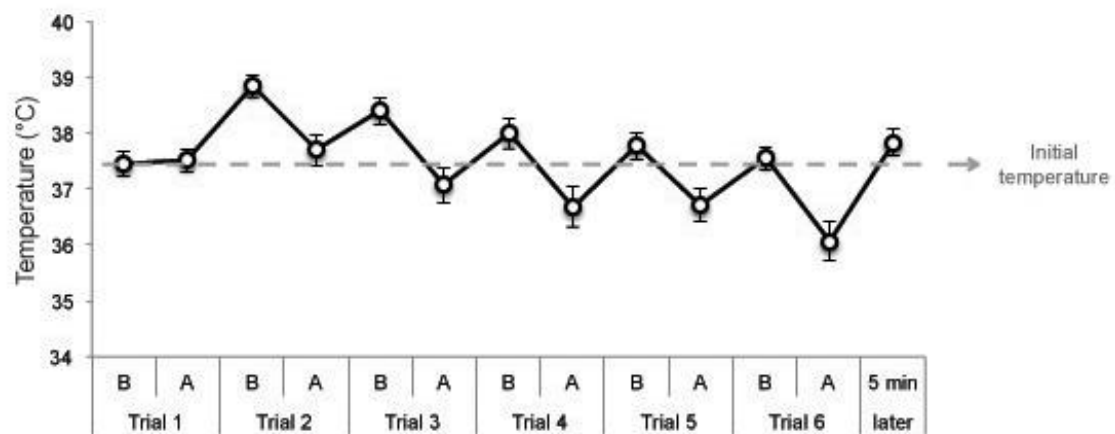

**Supplementary Figure 7:** Body temperature measurements before (B) and after (A) watermaze trials in a session of 6 trials matching the average swimming times of the memory encoding group, using identical conditions (including the inter-trial interval of 5 min) as in the rest of our study. Only minimal changes in body temperature were observed, with the temperature largely restored after each trial. There was no decrease in the body temperature after all 6 trials compared to that before the trials. These data suggest that it is unlikely that there are any major effects of body temperature on glucose uptake measurements. Means  $\pm$  1 S.E.M.

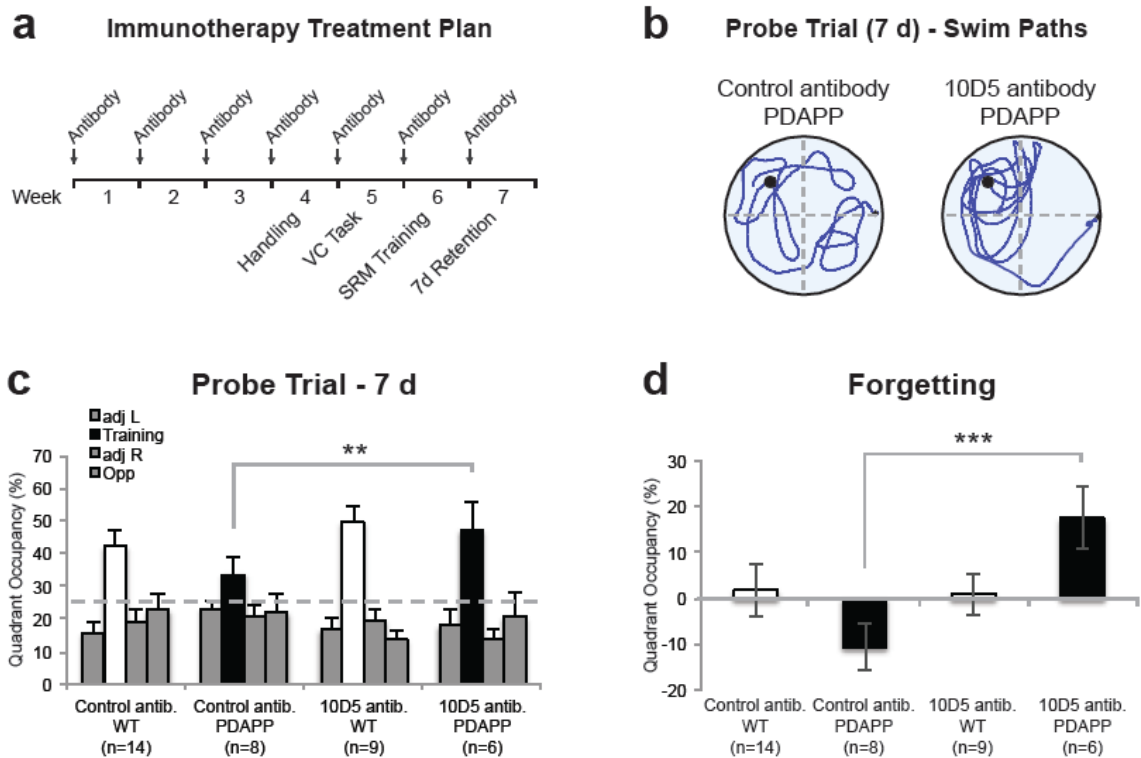

**Supplementary Figure 8: Rescue of spatial memory deficits in young PDAPP mice by anti- $\beta$ -amyloid immunotherapy.** **A.** Immunotherapy regime, consisting of weekly i.p. administration of either the anti-A $\beta$  (10D5) antibody or an isotype control antibody, beginning 4 weeks before watermaze training and continuing throughout training (dose = 10 mg/kg). **B.** Representative swim paths of 10D5-treated and control-treated PDAPP animals in the memory retrieval probe test 7 days after reaching criterion. **C.** Treatment with the control or the 10D5 antibody did not affect the probe test search pattern of WT mice at 7 d compared to that at 10 min (ANOVA, quadrants x memory-delay x antibody interaction:  $F < 1$ ). In contrast, a significant triple interaction was observed for the PDAPP mice ( $F_{3,36} = 3.83$ ,  $p = 0.018$ ). Data shown are scores at the 7 d probe test; a planned orthogonal comparison revealed significantly more focused searching in the target quadrant by PDAPP mice treated with 10D5 antibody than the control treatment ( $F_{1,36} = 7.40$ ,  $p = 0.01$ ; this contrast highlighted in figure). **D.** Change in target quadrant occupancy (7 days minus 10 min) shows no decline in WT mice (open bars) but rescue in PDAPP mice (ANOVA, genotype x antibody interaction,  $F_{1,33} = 5.7$ ,  $p = 0.023$ ; orthogonal comparison between the 2 PDAPP groups also reveals significant rescue:  $F_{1,33} = 8.8$ ,  $p < 0.001$ ). \*\*:  $p \leq 0.01$ ; \*\*\*:  $p < 0.001$ . Means  $\pm$  1 S.E.M.



### Immunotherapy - 7 d Probe Trial

*Path Length (m)*

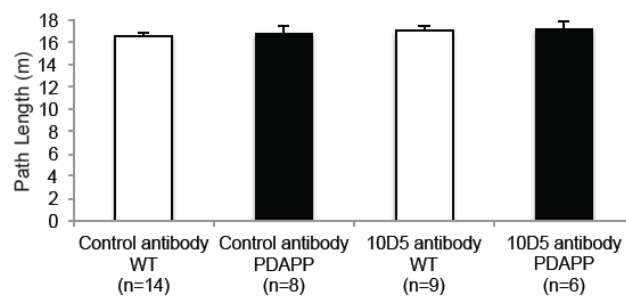

**Supplementary Figure 9:** *No adverse of the 10D5 anti-A $\beta$  antibody on the search path-length in the watermaze.* The length of the swim path during the 7 d probe test was equivalent between mice treated with the 10D5 antibody (black) and mice treated with the control antibody (white). ANOVA:  $F_s < 1$  for a) genotype, b) treatment, and c) genotype x treatment comparisons. Means  $\pm$  1 S.E.M.

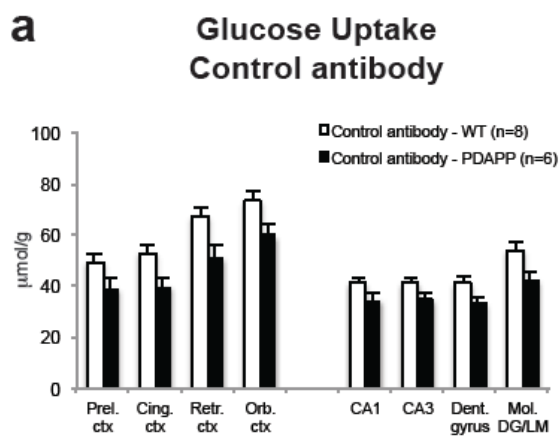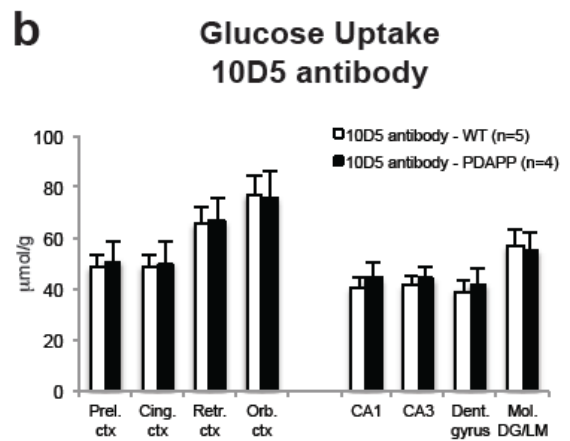

**Supplementary Figure 10: Rescue of memory retrieval-associated glucose uptake deficits in young PDAPP mice by anti- $\beta$ -amyloid immunotherapy.** **A.** Analysis of glucose uptake in mice treated with the control antibody replicated the result of higher uptake in neocortex of WT mice compared to PDAPP mice during memory retrieval at 7 d (Neocortex:  $F_{1,12}=7.22$ ,  $p<0.025$ ; Hippocampus:  $F_{1,12}=4.35$ ,  $p=0.059$ ). **B.** Treatment with the 10D5 antibody rescued the impairment in glucose uptake in PDAPP mice during memory retrieval, with no genotype differences ( $F_s<1$ ). Means  $\pm$  1 S.E.M.

**A $\beta$  Levels - Whole Brain**  
(pmol / gr tissue)

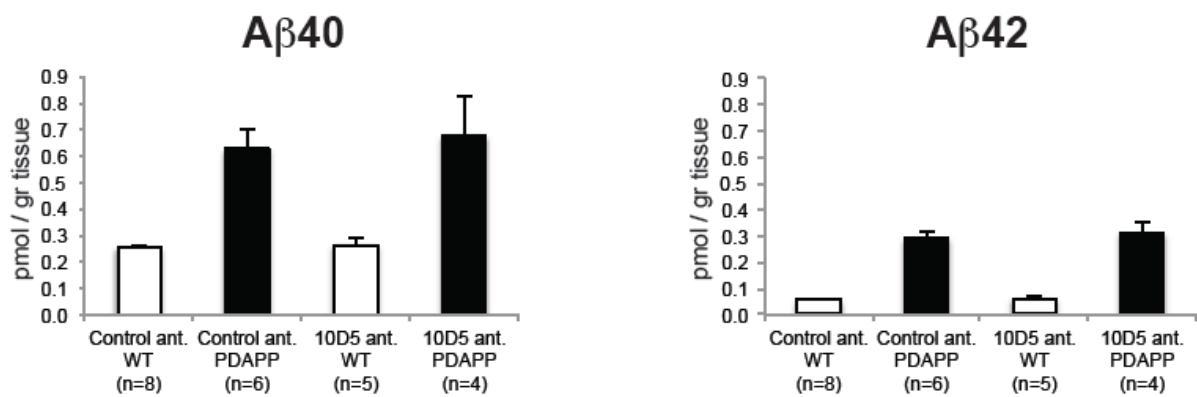

**Supplementary Figure 11:** ELISA measures of soluble A $\beta$ 40 (left) and A $\beta$ 42 (right) across genotypic and immunotherapy treatment groups. No difference was observed between 10D5-treated and control-antibody-treated PDAPP mice. ANOVAs showed higher levels in PDAPP compared to WT mice, as expected (A $\beta$ 40:  $F_{1,19}=37.2$ ,  $p<0.001$ ; A $\beta$ 42:  $F_{1,19}=145.1$ ,  $p<0.001$ ), but still relatively low at this young age. Means  $\pm$  1 S.E.M.

### A $\beta$ 42 - Interstitial Fluid % of Basal Levels

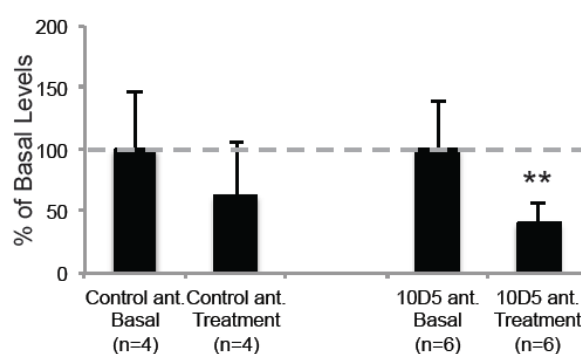

**Supplementary Figure 12:** *ELISA measures of A $\beta$ 42 in the interstitial fluid following microdialysis in PDAPP mice.* In a separate experiment from those described above, measures were taken of A $\beta$ 42 for each animal at basal levels (before antibody treatment) and after treatment. Values are expressed as % of the basal levels average for each treatment group. The dotted line indicates the basal levels average. An ANOVA showed a clear trend towards a decrease induced by the treatments ( $F_{1,8}=3.99$ ,  $0.1 > p > 0.05$ ) but this did not differ across groups ( $F < 1$ ). However, the levels of A $\beta$ 42 after 10D5 treatment (but not control treatment) were significantly below the baseline average (dotted line). A $\beta$ 40 levels were not possible to analyse due to the assay used not being sensitive enough. \*\*:  $p < 0.01$ . Means  $\pm$  1 S.E.M.

|                         | WT (n=22)  | PDAPP (n=18) |
|-------------------------|------------|--------------|
| Prelimbic cortex        | 48.9 ± 3.3 | 34.6 ± 2.5   |
| Cingulate cortex        | 52.1 ± 3.8 | 35.5 ± 2.2   |
| Retrosplenial cortex    | 69.8 ± 4.9 | 46.5 ± 3.5   |
| Orbital cortex          | 74.5 ± 4.8 | 54.9 ± 3.4   |
| Frontal cortex          | 44.7 ± 2.4 | 36.4 ± 2.1   |
| Motor cortex            | 59.3 ± 3.6 | 44.3 ± 2.7   |
| Visual cortex           | 77.0 ± 5.9 | 62.0 ± 4.2   |
| Somatosensory cortex    | 66.8 ± 4.0 | 50.9 ± 2.9   |
| Caudate putamen         | 62.9 ± 3.7 | 49.1 ± 2.7   |
| Nucleus accumbens       | 39.8 ± 3.2 | 28.3 ± 2.3   |
| Globus pallidus         | 44.1 ± 2.7 | 33.7 ± 1.9   |
| Lateral septum          | 39.5 ± 2.8 | 28.5 ± 1.6   |
| Amygdala                | 36.1 ± 2.2 | 27.0 ± 1.5   |
| Hippocampus (whole)     | 45.1 ± 3.0 | 33.8 ± 1.9   |
| Cornu Ammonis 1         | 39.3 ± 2.6 | 32.0 ± 1.8   |
| Cornu Ammonis 3         | 38.6 ± 2.4 | 31.3 ± 1.7   |
| Dentate gyrus           | 39.2 ± 2.9 | 31.1 ± 1.6   |
| Molec. DG / Lacun. mol. | 54.0 ± 3.7 | 38.2 ± 2.3   |
| Fimbria hippocampus     | 20.8 ± 1.3 | 15.7 ± 0.8   |
| Dorsal subiculum        | 59.8 ± 4.0 | 42.8 ± 2.5   |
| Postsubiculum           | 60.3 ± 3.7 | 41.5 ± 2.5   |
| Thalamus (whole)        | 67.7 ± 4.0 | 49.3 ± 2.8   |
| LP thalamic nucleus     | 77.3 ± 5.6 | 51.6 ± 3.4   |
| L-D thalamic nucleus    | 73.1 ± 5.5 | 47.9 ± 2.9   |
| D-L geniculate nucleus  | 85.0 ± 5.4 | 59.1 ± 3.8   |
| Subthalamic nucleus     | 66.2 ± 4.0 | 48.5 ± 2.7   |
| Zona inserta            | 65.2 ± 3.8 | 47.4 ± 2.5   |
| Hypothalamus            | 35.3 ± 2.1 | 27.1 ± 1.6   |
| Superior colliculus     | 55.1 ± 2.9 | 44.1 ± 2.2   |
| Inferior colliculus     | 98.2 ± 5.7 | 78.0 ± 5.2   |
| Periaqueductal grey     | 33.1 ± 2.4 | 27.4 ± 1.8   |
| Cerebellum              | 55.8 ± 2.8 | 41.6 ± 2.3   |

**Supplementary Table 1:** Glucose uptake ( $\mu\text{mol/g}$ ) in brain structures during memory retrieval after 7 days. Values are expressed as average  $\pm$  SEM.

|                         | Training + Memory Retrieval |             | Training Only |             |
|-------------------------|-----------------------------|-------------|---------------|-------------|
|                         | WT (n=9)                    | PDAPP (n=6) | WT (n=10)     | PDAPP (n=6) |
| Prelimbic cortex        | 43.4 ± 3.6                  | 34.5 ± 3.9  | 47.1 ± 3.2    | 38.7 ± 5.2  |
| Cingulate cortex        | 45.3 ± 4.3                  | 33.9 ± 3.6  | 49.0 ± 3.9    | 38.8 ± 5.4  |
| Retrosplenial cortex    | 69.4 ± 8.7                  | 44.2 ± 5.6  | 66.6 ± 5.9    | 56.8 ± 9.0  |
| Orbital cortex          | 69.2 ± 6.7                  | 53.1 ± 7.0  | 72.3 ± 9.4    | 67.0 ± 9.5  |
| Frontal cortex          | 39.1 ± 3.0                  | 34.9 ± 4.0  | 42.6 ± 4.4    | 39.8 ± 4.8  |
| Motor cortex            | 53.5 ± 4.5                  | 43.8 ± 5.4  | 55.3 ± 6.0    | 51.9 ± 6.7  |
| Visual cortex           | 69.7 ± 6.3                  | 62.0 ± 9.7  | 77.5 ± 10.7   | 78.0 ± 11.5 |
| Somatosensory cortex    | 62.3 ± 5.4                  | 48.9 ± 6.1  | 62.4 ± 7.3    | 60.0 ± 7.3  |
| Caudate putamen         | 56.9 ± 4.4                  | 45.5 ± 4.8  | 55.6 ± 6.0    | 53.6 ± 6.7  |
| Nucleus accumbens       | 33.2 ± 2.2                  | 24.2 ± 4.6  | 38.1 ± 3.1    | 28.3 ± 3.7  |
| Globus pallidus         | 38.6 ± 2.6                  | 30.5 ± 2.8  | 40.0 ± 4.2    | 33.8 ± 4.2  |
| Lateral septum          | 34.8 ± 2.6                  | 26.0 ± 2.9  | 36.9 ± 3.1    | 33.4 ± 4.5  |
| Amygdala                | 30.3 ± 1.9                  | 24.6 ± 2.4  | 36.3 ± 3.8    | 30.7 ± 3.6  |
| Hippocampus (whole)     | 39.6 ± 3.0                  | 31.1 ± 3.1  | 41.2 ± 4.4    | 37.7 ± 4.3  |
| Cornu Ammonis 1         | 33.5 ± 2.3                  | 29.2 ± 2.8  | 37.0 ± 3.9    | 35.3 ± 4.1  |
| Cornu Ammonis 3         | 33.2 ± 1.8                  | 28.7 ± 2.5  | 37.7 ± 3.9    | 35.2 ± 4.2  |
| Dentate gyrus           | 32.1 ± 2.0                  | 28.8 ± 2.5  | 36.6 ± 3.5    | 32.6 ± 3.5  |
| Molec. DG / Lacun. mol. | 48.2 ± 4.3                  | 33.7 ± 3.8  | 49.9 ± 5.8    | 43.7 ± 5.7  |
| Fimbria hippocampus     | 17.3 ± 1.2                  | 14.8 ± 1.5  | 19.5 ± 2.2    | 15.8 ± 1.7  |
| Dorsal subiculum        | 53.8 ± 4.2                  | 39.1 ± 4.3  | 54.1 ± 5.8    | 45.4 ± 5.7  |
| Postsubiculum           | 54.7 ± 4.1                  | 38.0 ± 3.6  | 54.0 ± 5.7    | 45.7 ± 5.6  |
| Thalamus (whole)        | 60.6 ± 4.2                  | 46.6 ± 5.3  | 61.1 ± 6.2    | 52.3 ± 5.8  |
| LP thalamic nucleus     | 70.8 ± 6.0                  | 45.8 ± 5.3  | 67.0 ± 7.4    | 60.0 ± 7.8  |
| L-D thalamic nucleus    | 66.2 ± 5.6                  | 44.8 ± 5.3  | 64.8 ± 7.6    | 52.5 ± 6.5  |
| D-L geniculate nucleus  | 78.2 ± 6.2                  | 53.7 ± 6.1  | 79.6 ± 9.6    | 68.7 ± 9.9  |
| Subthalamic nucleus     | 59.5 ± 5.1                  | 43.8 ± 4.8  | 57.3 ± 6.6    | 48.3 ± 6.4  |
| Zona inserta            | 60.9 ± 5.4                  | 45.1 ± 4.9  | 57.9 ± 6.4    | 50.4 ± 6.5  |
| Hypothalamus            | 29.8 ± 1.9                  | 25.6 ± 2.7  | 32.6 ± 2.3    | 28.7 ± 3.4  |
| Superior colliculus     | 54.2 ± 4.4                  | 42.2 ± 4.6  | 51.0 ± 5.7    | 49.6 ± 5.8  |
| Inferior colliculus     | 103.3 ± 10.2                | 80.8 ± 12.5 | 104.5 ± 13.4  | 97.0 ± 13.5 |
| Periaqueductal grey     | 28.3 ± 2.1                  | 24.8 ± 2.5  | 31.2 ± 2.7    | 27.1 ± 3.1  |
| Cerebellum              | 52.9 ± 3.0                  | 39.3 ± 4.2  | 50.8 ± 5.7    | 47.3 ± 7.0  |

**Supplementary Table 2:** Glucose uptake ( $\mu\text{mol/g}$ ) in brain structures in the ‘training + memory retrieval’ group and the ‘training only’ group. The data of the training + memory retrieval group shown here are included in the combined data presented in Table 1. The two groups shown here were trained and analysed at the same time. Values are expressed as average  $\pm$  SEM.

|                         | Sensorimotor Control |             | Basal Levels (i.p.-injected) |             |
|-------------------------|----------------------|-------------|------------------------------|-------------|
|                         | WT (n=6)             | PDAPP (n=5) | WT (n=6)                     | PDAPP (n=4) |
| Prelimbic cortex        | 27.7 ± 4.9           | 29.1 ± 8.6  | 32.1 ± 4.3                   | 25.5 ± 0.8  |
| Cingulate cortex        | 28.8 ± 3.4           | 30.2 ± 9.0  | 33.5 ± 4.2                   | 25.0 ± 1.5  |
| Retrosplenial cortex    | 35.1 ± 5.1           | 38.2 ± 8.7  | 40.1 ± 6.3                   | 31.1 ± 1.4  |
| Orbital cortex          | 40.1 ± 4.6           | 42.1 ± 6.1  | 50.4 ± 9.6                   | 41.9 ± 1.9  |
| Frontal cortex          | 26.8 ± 3.4           | 26.1 ± 3.4  | 28.3 ± 4.9                   | 25.7 ± 0.9  |
| Motor cortex            | 32.3 ± 4.1           | 33.8 ± 4.7  | 35.4 ± 5.8                   | 31.3 ± 1.0  |
| Visual cortex           | 41.2 ± 4.8           | 44.6 ± 7.9  | 53.5 ± 8.7                   | 45.0 ± 1.3  |
| Somatosensory cortex    | 35.2 ± 5.1           | 37.4 ± 5.3  | 39.9 ± 6.8                   | 36.2 ± 1.1  |
| Caudate putamen         | 36.5 ± 4.6           | 40.2 ± 6.0  | 36.3 ± 6.1                   | 34.7 ± 1.1  |
| Nucleus accumbens       | 25.8 ± 4.9           | 27.2 ± 5.2  | 22.6 ± 3.4                   | 23.0 ± 1.5  |
| Globus pallidus         | 26.4 ± 3.7           | 25.9 ± 3.6  | 27.4 ± 4.6                   | 24.4 ± 0.9  |
| Lateral septum          | 24.8 ± 3.3           | 27.4 ± 4.5  | 23.7 ± 3.3                   | 20.9 ± 0.6  |
| Amygdala                | 22.2 ± 3.1           | 23.9 ± 3.6  | 23.8 ± 4.0                   | 20.5 ± 0.7  |
| Hippocampus (whole)     | 26.8 ± 3.4           | 26.4 ± 3.9  | 30.5 ± 4.8                   | 27.7 ± 1.8  |
| Cornu Ammonis 1         | 24.1 ± 3.4           | 25.0 ± 3.7  | 27.1 ± 4.3                   | 26.0 ± 2.2  |
| Cornu Ammonis 3         | 23.5 ± 3.0           | 23.7 ± 3.6  | 26.9 ± 4.2                   | 26.3 ± 1.6  |
| Dentate gyrus           | 25.3 ± 4.0           | 24.4 ± 3.4  | 28.1 ± 4.5                   | 25.7 ± 2.2  |
| Molec. DG / Lacun. mol. | 30.2 ± 3.3           | 28.7 ± 4.9  | 34.3 ± 5.8                   | 31.5 ± 1.7  |
| Fimbria hippocampus     | 15.3 ± 2.5           | 15.2 ± 2.0  | 15.0 ± 2.1                   | 13.0 ± 0.4  |
| Dorsal subiculum        | 34.3 ± 3.6           | 33.2 ± 5.2  | 37.7 ± 7.2                   | 33.0 ± 1.2  |
| Postsubiculum           | 35.6 ± 4.1           | 34.3 ± 5.3  | 34.0 ± 7.9                   | 31.3 ± 0.7  |
| Thalamus (whole)        | 39.8 ± 4.8           | 38.4 ± 5.3  | 38.2 ± 6.3                   | 35.1 ± 0.7  |
| LP thalamic nucleus     | 42.9 ± 4.4           | 40.9 ± 6.8  | 43.6 ± 7.3                   | 38.7 ± 1.1  |
| L-D thalamic nucleus    | 39.0 ± 4.3           | 38.2 ± 7.0  | 41.9 ± 7.2                   | 37.3 ± 1.2  |
| D-L geniculate nucleus  | 43.2 ± 5.1           | 43.4 ± 7.5  | 50.9 ± 8.2                   | 43.7 ± 1.4  |
| Subthalamic nucleus     | 40.0 ± 5.8           | 37.9 ± 6.0  | 38.7 ± 7.2                   | 37.3 ± 1.5  |
| Zona inserta            | 36.3 ± 4.8           | 34.6 ± 5.2  | 37.5 ± 6.5                   | 34.4 ± 1.4  |
| Hypothalamus            | 23.4 ± 5.1           | 23.2 ± 3.4  | 21.1 ± 3.0                   | 22.2 ± 1.6  |
| Superior colliculus     | 37.6 ± 6.1           | 35.5 ± 4.9  | 38.2 ± 8.2                   | 34.7 ± 2.3  |
| Inferior colliculus     | 58.0 ± 8.6           | 61.1 ± 9.5  | 69.8 ± 13.4                  | 60.3 ± 5.7  |
| Periaqueductal grey     | 27.7 ± 12.5          | 27.9 ± 4.2  | 21.5 ± 3.8                   | 22.2 ± 1.4  |
| Cerebellum              | 33.8 ± 9.5           | 34.4 ± 4.2  | 38.7 ± 7.1                   | 31.0 ± 2.3  |

**Supplementary Table 3:** Glucose uptake ( $\mu\text{mol/g}$ ) in brain structures in the sensorimotor control and basal levels groups (i.p.injected). Values are expressed as average  $\pm$  SEM.

|                         | Memory Encoding |             | Consolidated Memory |             |
|-------------------------|-----------------|-------------|---------------------|-------------|
|                         | WT (n=4)        | PDAPP (n=3) | WT (n=6)            | PDAPP (n=5) |
| Prelimbic cortex        | 17.9 ± 1.4      | 20.6 ± 4.5  | 30.0 ± 1.9          | 26.7 ± 1.3  |
| Cingulate cortex        | 18.5 ± 1.5      | 19.9 ± 4.3  | 32.4 ± 2.2          | 26.1 ± 1.9  |
| Retrosplenial cortex    | 23.6 ± 2.2      | 25.7 ± 3.6  | 40.9 ± 2.7          | 34.2 ± 2.2  |
| Orbital cortex          | 27.2 ± 1.2      | 30.6 ± 5.1  | 45.6 ± 3.4          | 39.0 ± 3.3  |
| Frontal cortex          | 16.9 ± 1.4      | 22.0 ± 3.7  | 29.2 ± 1.7          | 25.6 ± 2.2  |
| Motor cortex            | 19.8 ± 1.8      | 23.7 ± 4.3  | 34.7 ± 2.1          | 30.8 ± 2.1  |
| Visual cortex           | 28.3 ± 2.7      | 35.7 ± 4.1  | 46.8 ± 3.5          | 40.1 ± 3.8  |
| Somatosensory cortex    | 23.1 ± 2.5      | 25.8 ± 5.6  | 40.3 ± 2.7          | 35.7 ± 3.2  |
| Caudate putamen         | 22.7 ± 1.7      | 27.5 ± 4.5  | 39.5 ± 3.0          | 35.4 ± 2.7  |
| Nucleus accumbens       | 16.7 ± 1.1      | 17.0 ± 1.7  | 26.6 ± 2.2          | 23.8 ± 2.1  |
| Globus pallidus         | 16.4 ± 1.4      | 16.6 ± 2.6  | 29.0 ± 1.9          | 24.2 ± 2.0  |
| Lateral septum          | 15.5 ± 1.1      | 16.2 ± 3.2  | 27.0 ± 1.6          | 20.4 ± 1.2  |
| Amygdala                | 14.0 ± 1.4      | 15.7 ± 1.3  | 23.7 ± 1.5          | 19.7 ± 1.7  |
| Hippocampus (whole)     | 17.2 ± 1.4      | 18.6 ± 3.0  | 31.5 ± 1.7          | 27.1 ± 2.6  |
| Cornu Ammonis 1         | 15.4 ± 0.8      | 17.3 ± 2.6  | 26.6 ± 1.4          | 24.7 ± 1.9  |
| Cornu Ammonis 3         | 14.9 ± 0.6      | 16.1 ± 2.1  | 26.3 ± 1.5          | 23.9 ± 2.0  |
| Dentate gyrus           | 17.6 ± 0.7      | 17.1 ± 2.0  | 27.2 ± 1.8          | 23.8 ± 2.4  |
| Molec. DG / Lacun. mol. | 20.6 ± 1.7      | 20.5 ± 4.3  | 38.0 ± 3.2          | 32.6 ± 4.6  |
| Fimbria hippocampus     | 8.7 ± 1.3       | 8.0 ± 1.6   | 15.8 ± 1.3          | 12.7 ± 1.1  |
| Dorsal subiculum        | 22.8 ± 1.7      | 22.4 ± 4.1  | 37.1 ± 2.4          | 32.6 ± 3.0  |
| Postsubiculum           | 24.9 ± 1.5      | 22.1 ± 4.6  | 38.9 ± 3.2          | 33.6 ± 2.7  |
| Thalamus (whole)        | 25.8 ± 1.9      | 27.9 ± 5.0  | 41.7 ± 2.7          | 35.2 ± 3.4  |
| LP thalamic nucleus     | 30.2 ± 2.6      | 30.6 ± 5.2  | 47.5 ± 4.1          | 38.8 ± 4.1  |
| L-D thalamic nucleus    | 28.2 ± 2.9      | 29.0 ± 5.3  | 44.1 ± 3.2          | 38.9 ± 4.3  |
| D-L geniculate nucleus  | 31.6 ± 1.8      | 35.3 ± 5.3  | 51.7 ± 4.1          | 40.0 ± 4.2  |
| Subthalamic nucleus     | 24.3 ± 3.9      | 28.6 ± 4.9  | 41.9 ± 3.4          | 35.8 ± 3.8  |
| Zona inserta            | 21.9 ± 1.5      | 26.3 ± 3.8  | 38.9 ± 2.5          | 34.3 ± 3.1  |
| Hypothalamus            | 13.5 ± 2.0      | 15.6 ± 1.6  | 25.5 ± 2.1          | 21.6 ± 2.0  |
| Superior colliculus     | 22.0 ± 2.0      | 27.5 ± 2.4  | 38.9 ± 2.9          | 30.6 ± 2.1  |
| Inferior colliculus     | 32.3 ± 1.2      | 46.0 ± 13.9 | 61.3 ± 6.6          | 52.3 ± 6.3  |
| Periaqueductal grey     | 13.8 ± 1.9      | 19.7 ± 2.7  | 22.1 ± 2.2          | 20.4 ± 0.7  |
| Cerebellum              | 20.5 ± 1.5      | 24.7 ± 5.3  | 33.6 ± 2.7          | 30.0 ± 2.1  |

**Supplementary Table 4:** Glucose uptake ( $\mu\text{mol/g}$ ) in brain structures in the memory encoding and consolidated memory groups. Values are expressed as average  $\pm$  SEM.



|                         | Control antibody |             | 10D5 antibody |              |
|-------------------------|------------------|-------------|---------------|--------------|
|                         | WT (n=8)         | PDAPP (n=6) | WT (n=5)      | PDAPP (n=4)  |
| Prelimbic cortex        | 49.3 ± 3.1       | 38.8 ± 3.8  | 48.6 ± 4.6    | 51.0 ± 7.9   |
| Cingulate cortex        | 53.0 ± 3.3       | 39.7 ± 3.5  | 49.1 ± 4.7    | 50.3 ± 8.6   |
| Retrosplenial cortex    | 67.1 ± 3.6       | 50.8 ± 5.0  | 65.7 ± 6.8    | 66.6 ± 9.1   |
| Orbital cortex          | 73.2 ± 3.8       | 59.5 ± 5.0  | 77.0 ± 7.7    | 75.6 ± 11.0  |
| Frontal cortex          | 48.5 ± 1.7       | 40.8 ± 3.0  | 46.6 ± 4.9    | 49.9 ± 7.7   |
| Motor cortex            | 60.4 ± 3.4       | 49.1 ± 3.9  | 58.1 ± 7.0    | 63.1 ± 10.0  |
| Visual cortex           | 73.2 ± 4.2       | 65.4 ± 4.9  | 75.8 ± 8.4    | 83.4 ± 12.9  |
| Somatosensory cortex    | 67.6 ± 4.2       | 56.4 ± 4.3  | 69.1 ± 8.7    | 68.9 ± 10.1  |
| Caudate putamen         | 65.0 ± 3.7       | 55.8 ± 4.2  | 65.9 ± 7.4    | 70.0 ± 10.6  |
| Nucleus accumbens       | 39.4 ± 1.7       | 31.8 ± 2.8  | 40.0 ± 5.3    | 40.8 ± 6.2   |
| Globus pallidus         | 46.9 ± 3.0       | 39.1 ± 3.6  | 46.3 ± 5.1    | 47.1 ± 6.9   |
| Lateral septum          | 41.2 ± 2.6       | 31.7 ± 2.1  | 40.7 ± 6.1    | 42.2 ± 5.8   |
| Amygdala                | 39.1 ± 2.5       | 31.4 ± 2.8  | 40.3 ± 5.0    | 39.2 ± 5.5   |
| Hippocampus (whole)     | 46.0 ± 2.8       | 36.3 ± 3.1  | 46.1 ± 5.5    | 47.2 ± 6.5   |
| Cornu Ammonis 1         | 41.0 ± 2.2       | 34.3 ± 2.9  | 40.5 ± 4.5    | 44.2 ± 6.4   |
| Cornu Ammonis 3         | 40.9 ± 2.4       | 34.5 ± 3.1  | 41.5 ± 4.2    | 44.1 ± 5.2   |
| Dentate gyrus           | 40.8 ± 3.2       | 33.0 ± 2.7  | 39.5 ± 4.5    | 42.1 ± 6.1   |
| Molec. DG / Lacun. mol. | 53.8 ± 3.0       | 41.9 ± 3.5  | 56.8 ± 6.4    | 55.3 ± 7.3   |
| Fimbria hippocampus     | 22.9 ± 1.6       | 17.6 ± 1.5  | 21.4 ± 2.7    | 22.0 ± 2.6   |
| Dorsal subiculum        | 59.1 ± 3.3       | 45.7 ± 4.0  | 58.6 ± 7.1    | 56.2 ± 7.4   |
| Postsubiculum           | 59.8 ± 3.9       | 45.1 ± 4.0  | 61.5 ± 7.9    | 55.0 ± 7.7   |
| Thalamus (whole)        | 70.0 ± 3.6       | 56.0 ± 4.2  | 70.7 ± 8.5    | 70.2 ± 12.3  |
| LP thalamic nucleus     | 75.1 ± 3.6       | 58.8 ± 4.9  | 77.7 ± 9.4    | 71.2 ± 10.7  |
| L-D thalamic nucleus    | 72.0 ± 3.5       | 52.3 ± 3.8  | 71.5 ± 8.1    | 66.3 ± 9.6   |
| D-L geniculate nucleus  | 84.1 ± 4.0       | 67.5 ± 5.4  | 86.8 ± 12.1   | 83.3 ± 13.9  |
| Subthalamic nucleus     | 66.6 ± 3.5       | 53.5 ± 4.4  | 68.4 ± 7.4    | 67.6 ± 11.3  |
| Zona inserta            | 66.2 ± 3.3       | 53.3 ± 4.1  | 67.3 ± 7.2    | 66.1 ± 10.4  |
| Hypothalamus            | 38.0 ± 2.2       | 30.6 ± 3.6  | 36.3 ± 4.4    | 40.0 ± 6.3   |
| Superior colliculus     | 55.3 ± 3.0       | 46.5 ± 3.7  | 53.0 ± 6.1    | 57.8 ± 8.5   |
| Inferior colliculus     | 91.9 ± 4.1       | 85.4 ± 7.0  | 99.6 ± 12.9   | 104.9 ± 11.8 |
| Periaqueductal grey     | 36.4 ± 2.2       | 29.1 ± 2.8  | 39.0 ± 4.6    | 40.9 ± 5.9   |
| Cerebellum              | 58.4 ± 3.3       | 46.5 ± 4.3  | 62.9 ± 6.2    | 60.5 ± 8.6   |

**Supplementary Table 5:** Glucose uptake ( $\mu\text{mol/g}$ ) in brain structures during memory retrieval after 7 days in the control antibody-treated group and the 10D5 antibody-treated group. Values are expressed as average  $\pm$  SEM.

**Supplementary Table 6: Full quadrant scores for the 10 min and 7 d probe tests.**

| <b>WT 10 min</b> |                   |              |              |              | <b>WT 7 days</b> |                   |              |              |              |
|------------------|-------------------|--------------|--------------|--------------|------------------|-------------------|--------------|--------------|--------------|
| Animal           | Quadrant time (%) |              |              |              | Animal           | Quadrant time (%) |              |              |              |
|                  | adj L             | Training     | adj R        | Opp          |                  | adj L             | Training     | adj R        | Opp          |
| F2711            | 8.54              | 34.17        | 26.80        | 30.49        | F2711            | 14.62             | 31.06        | 18.44        | 35.88        |
| F2715            | 14.43             | 41.28        | 27.69        | 16.61        | F2715            | 14.24             | 37.02        | 21.27        | 27.47        |
| F2719            | 9.48              | 68.22        | 22.30        | 0.00         | F2719            | 27.29             | 57.24        | 14.14        | 1.33         |
| F2720            | 7.16              | 47.59        | 31.28        | 13.98        | F2720            | 9.90              | 48.32        | 28.69        | 13.09        |
| F2843            | 10.39             | 40.54        | 31.83        | 17.25        | F2843            | 2.01              | 44.30        | 42.45        | 11.24        |
| F2842            | 14.93             | 53.86        | 15.27        | 15.94        | F2842            | 19.63             | 42.62        | 34.06        | 3.69         |
| F2847            | 8.22              | 76.85        | 14.93        | 0.00         | F2847            | 16.81             | 52.25        | 30.95        | 0.00         |
| F2848            | 29.65             | 29.15        | 25.29        | 15.91        | F2848            | 15.08             | 43.72        | 19.60        | 21.61        |
| F2850            | 14.74             | 55.95        | 20.94        | 8.38         | F2850            | 13.07             | 56.28        | 16.58        | 14.07        |
| F4512            | 2.01              | 30.32        | 42.71        | 24.96        | F4512            | 7.81              | 53.65        | 11.63        | 26.91        |
| F4513            | 20.63             | 40.77        | 25.46        | 13.15        | F4513            | 7.54              | 56.62        | 24.46        | 11.39        |
| F4527            | 52.16             | 8.97         | 0.00         | 38.87        | F4527            | 27.79             | 28.79        | 8.99         | 34.44        |
| F4528            | 27.69             | 34.06        | 23.15        | 15.10        | F4528            | 17.61             | 68.44        | 8.97         | 4.98         |
| F4535            | 34.11             | 22.63        | 16.47        | 26.79        | F4535            | 27.85             | 51.68        | 8.73         | 11.75        |
| F4536            | 13.81             | 34.11        | 14.81        | 37.27        | F4536            | 15.91             | 55.44        | 21.44        | 7.20         |
| F4567            | 29.65             | 40.20        | 16.92        | 13.23        | F4567            | 15.41             | 27.47        | 37.69        | 19.43        |
| F4568            | 41.76             | 27.12        | 12.65        | 18.47        | F4568            | 20.13             | 51.91        | 17.97        | 9.98         |
| F4587            | 16.11             | 32.06        | 41.20        | 10.63        | F4587            | 14.95             | 31.06        | 17.77        | 36.21        |
| F5714            | 25.58             | 30.40        | 15.28        | 28.74        | F5714            | 14.93             | 46.31        | 27.35        | 11.41        |
| F5715            | 17.94             | 25.08        | 31.56        | 25.42        | F5715            | 8.88              | 42.71        | 27.97        | 20.44        |
| F5733            | 2.33              | 46.26        | 26.29        | 25.13        | F5733            | 26.17             | 58.89        | 9.06         | 5.87         |
| F5734            | 16.14             | 21.30        | 35.11        | 27.45        | F5734            | 17.45             | 30.37        | 21.81        | 30.37        |
| F5740            | 11.96             | 73.26        | 13.62        | 1.16         | F5740            | 25.58             | 64.29        | 0.17         | 9.97         |
| F6302            | 37.21             | 34.05        | 12.79        | 15.95        | F6302            | 5.16              | 20.63        | 19.30        | 54.91        |
| F6308            | 32.05             | 34.73        | 15.60        | 17.62        | F6308            | 3.32              | 76.91        | 18.27        | 1.50         |
| F6310            | 25.67             | 29.03        | 7.22         | 38.09        | F6310            | 21.30             | 15.97        | 10.65        | 52.08        |
| F6324            | 7.04              | 73.20        | 5.70         | 14.07        | F6324            | 14.98             | 24.79        | 18.64        | 41.60        |
| F6325            | 22.95             | 29.98        | 18.59        | 28.48        | F6325            | 36.94             | 48.42        | 0.50         | 14.14        |
| F7503            | 34.17             | 21.94        | 21.94        | 21.94        | F7503            | 1.00              | 25.46        | 42.26        | 31.28        |
| F7513            | 11.96             | 40.86        | 23.92        | 23.26        | F7513            | 24.29             | 24.96        | 23.63        | 27.12        |
| F7520            | 8.54              | 54.77        | 25.46        | 11.22        | F7520            | 0.00              | 53.49        | 39.54        | 6.98         |
| F7523            | 11.58             | 51.85        | 25.67        | 10.91        | F7523            | 20.76             | 58.47        | 10.47        | 10.30        |
| <b>Average</b>   | <b>19.39</b>      | <b>40.14</b> | <b>21.51</b> | <b>18.95</b> | <b>Average</b>   | <b>15.89</b>      | <b>44.67</b> | <b>20.42</b> | <b>19.02</b> |
| <b>SE</b>        | <b>2.15</b>       | <b>2.90</b>  | <b>1.70</b>  | <b>1.80</b>  | <b>SE</b>        | <b>1.55</b>       | <b>2.66</b>  | <b>1.96</b>  | <b>2.58</b>  |
| SQRT(N)          | 5.66              | 5.66         | 5.66         | 5.66         | SQRT(N)          | 5.66              | 5.66         | 5.66         | 5.66         |

  

| <b>PDAPP 10 min</b> |                   |              |              |              | <b>PDAPP 7 days</b> |                   |              |              |              |
|---------------------|-------------------|--------------|--------------|--------------|---------------------|-------------------|--------------|--------------|--------------|
| Animal              | Quadrant time (%) |              |              |              | Animal              | Quadrant time (%) |              |              |              |
|                     | adj L             | Training     | adj R        | Opp          |                     | adj L             | Training     | adj R        | Opp          |
| F2728               | 15.58             | 28.14        | 30.49        | 25.80        | F2728               | 22.32             | 28.86        | 32.55        | 16.28        |
| F2713               | 10.05             | 51.26        | 28.31        | 10.39        | F2713               | 8.31              | 36.38        | 45.18        | 10.13        |
| F2717               | 14.48             | 61.23        | 20.80        | 3.49         | F2717               | 18.97             | 42.93        | 13.98        | 24.13        |
| F2718               | 32.50             | 57.79        | 7.20         | 2.51         | F2718               | 48.59             | 31.61        | 5.16         | 14.64        |
| F2845               | 21.64             | 65.77        | 11.75        | 0.84         | F2845               | 0.00              | 37.25        | 55.87        | 6.88         |
| F2851               | 21.63             | 50.08        | 19.30        | 8.99         | F2851               | 5.98              | 13.46        | 35.55        | 45.02        |
| F2852               | 7.89              | 62.92        | 27.35        | 1.85         | F2852               | 2.69              | 59.06        | 33.05        | 5.20         |
| F2853               | 47.15             | 34.23        | 8.73         | 9.90         | F2853               | 33.73             | 32.22        | 17.11        | 16.95        |
| F4516               | 15.14             | 51.91        | 26.96        | 5.99         | F4516               | 14.31             | 39.43        | 36.27        | 9.98         |
| F4517               | 18.44             | 63.62        | 13.95        | 3.99         | F4517               | 8.31              | 30.40        | 38.21        | 23.09        |
| F4531               | 25.96             | 48.07        | 12.23        | 13.74        | F4531               | 32.05             | 47.99        | 9.90         | 10.07        |
| F4533               | 19.14             | 26.46        | 20.47        | 33.94        | F4533               | 21.48             | 25.00        | 23.83        | 29.70        |
| F4534               | 17.25             | 21.27        | 36.85        | 24.62        | F4534               | 22.92             | 25.91        | 25.58        | 25.58        |
| F4566               | 28.07             | 34.88        | 12.96        | 24.09        | F4566               | 22.80             | 22.96        | 26.96        | 27.29        |
| F4588               | 20.10             | 33.33        | 29.48        | 17.09        | F4588               | 40.03             | 21.43        | 26.25        | 12.29        |
| F5717               | 12.79             | 23.75        | 36.21        | 27.24        | F5717               | 15.58             | 25.96        | 32.83        | 25.63        |
| F5741               | 12.25             | 42.95        | 26.68        | 18.12        | F5741               | 19.77             | 14.95        | 14.95        | 50.33        |
| F6323               | 21.61             | 46.06        | 8.38         | 23.95        | F6323               | 29.70             | 35.57        | 18.12        | 16.61        |
| F7514               | 27.69             | 20.13        | 14.93        | 37.25        | F7514               | 19.97             | 26.79        | 20.80        | 32.45        |
| F7515               | 15.12             | 53.99        | 19.27        | 11.63        | F7515               | 20.47             | 45.59        | 20.97        | 12.98        |
| F7521               | 6.15              | 45.35        | 39.54        | 8.97         | F7521               | 15.94             | 44.63        | 35.24        | 4.20         |
| F7522               | 19.10             | 64.99        | 13.40        | 2.51         | F7522               | 31.95             | 53.41        | 9.65         | 4.99         |
| F7532               | 19.10             | 58.46        | 9.05         | 13.40        | F7532               | 32.83             | 23.45        | 14.07        | 29.65        |
| <b>Average</b>      | <b>19.51</b>      | <b>45.51</b> | <b>20.62</b> | <b>14.36</b> | <b>Average</b>      | <b>21.25</b>      | <b>33.27</b> | <b>25.74</b> | <b>19.74</b> |
| <b>SE</b>           | <b>1.84</b>       | <b>3.12</b>  | <b>2.07</b>  | <b>2.24</b>  | <b>SE</b>           | <b>2.51</b>       | <b>2.46</b>  | <b>2.59</b>  | <b>2.58</b>  |
| SQRT(N)             | 4.80              | 4.80         | 4.80         | 4.80         | SQRT(N)             | 4.80              | 4.80         | 4.80         | 4.80         |

## Supplementary References

1. K. J. Hayes, The backward curve: a method for the study of learning. *Psychological Review* **60**, 269-275. (1953).
2. R. I. Spooner, A. Thomson, J. Hall, R. G. M. Morris, S. H. Salter, The Atlantis platform: a new design and further developments of Buresova's on-demand platform for the water maze. *Learning & memory* **1**, 203-211 (1994).
